# Supplementary material for: Generation of magnetoelectric photocurrents using toroidal resonances: a new class of infrared plasmonic photodetectors
Source: Royal Society of Chemistry journal article supplement (doi:10.1039/c9nr04312h), 2019-01-01
Supplement: c9nr04312h1.pdf [file c9nr04312h1.pdf]

## Supporting Information:

# Generation of Magnetoelectric Photocurrents using Toroidal Resonances: A New Class of Near-Infrared Plasmonic Photodetectors

Arash Ahmadivand,<sup>†\*</sup> Burak Gerislioglu,<sup>⊥</sup> Zeinab Ramezani<sup>‡</sup>

<sup>†</sup>*Department of Electrical and Computer Engineering, Rice University, Houston, TX 77005, USA*

<sup>⊥</sup>*Department of Physics and Astronomy, Rice University, Houston, TX 77005, USA*

<sup>‡</sup>*Electrical & Computer Engineering Department, Semnan University, Semnan, Iran*

[\\*ahmadiv@rice.edu](mailto:*ahmadiv@rice.edu)

**S1. Reflection spectra**

**S2. Magnetic field intensity**

**S3. Characteristic current-voltage profile**

**S4. Dark current**

**S5. Operation speed**

## 1. Reflection spectra

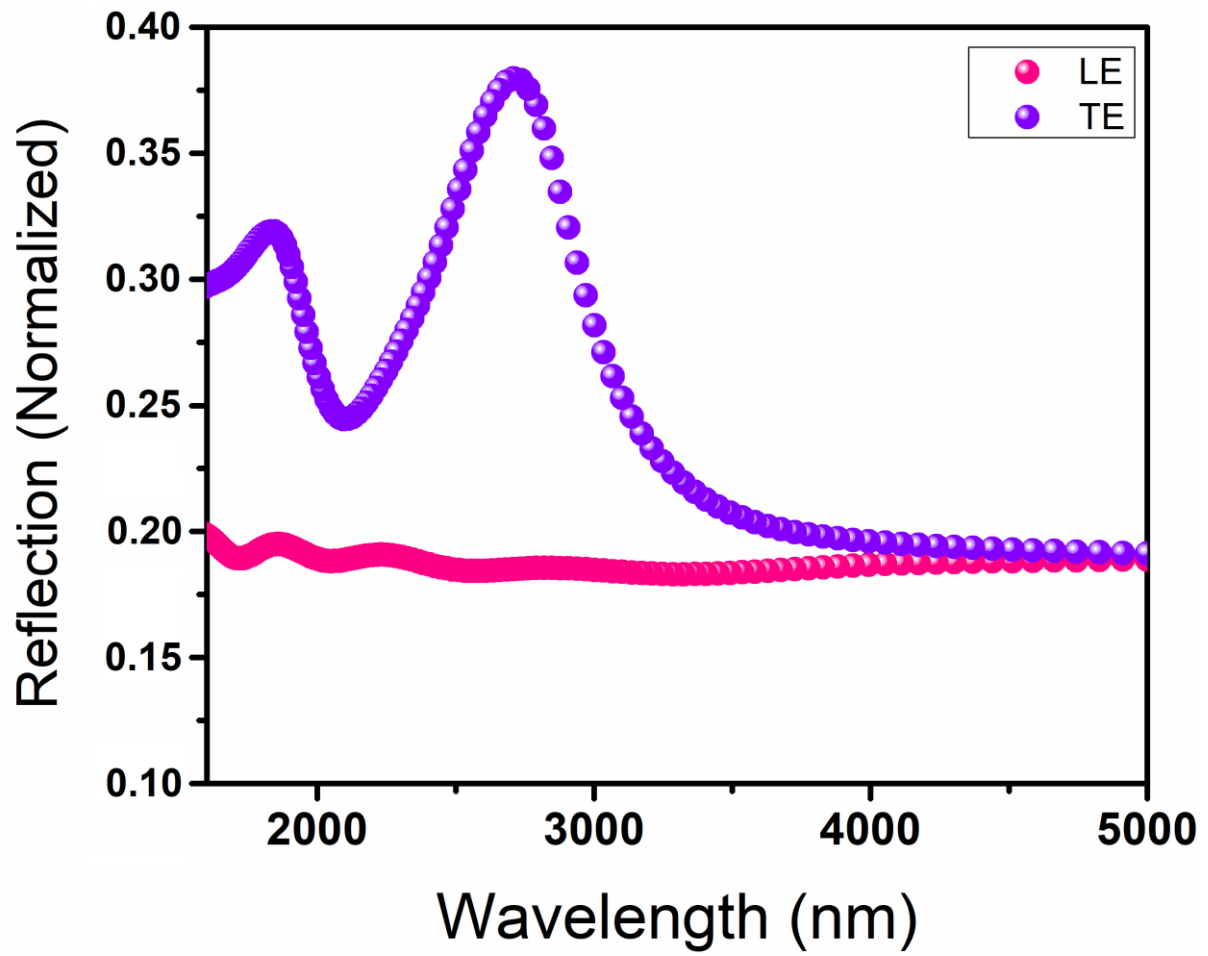

**Figure S1.** Reflection spectra for the toroidal plasmonic unit cell under transvers (TE) and longitudinal (LE) polarization excitation.

## 2. Magnetic-field intensity

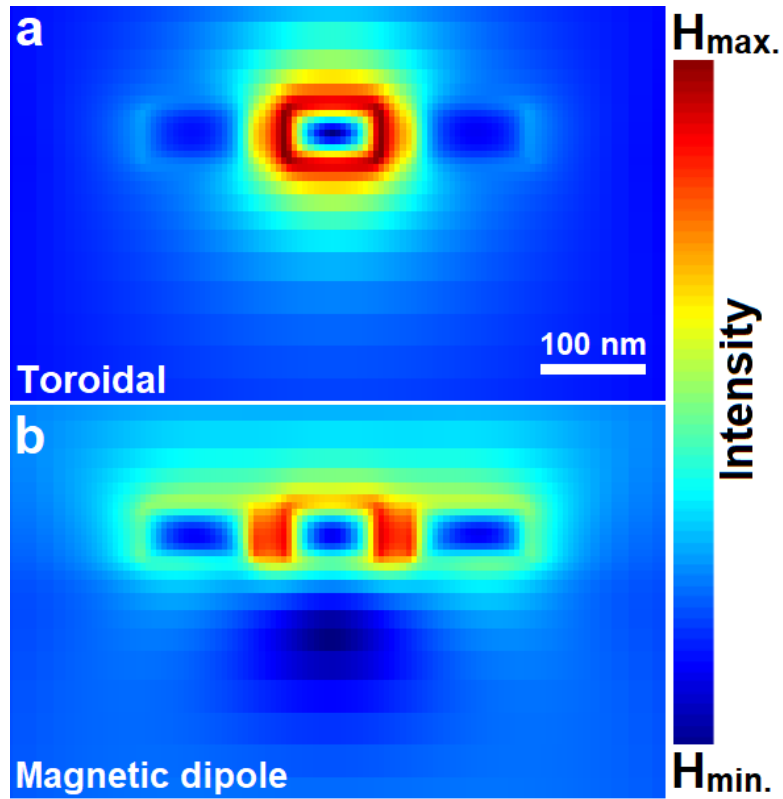

**Figure S2.** Cross-sectional full-field electromagnetic simulation of the magnetic field ( $H$ -field) intensity across the plasmonic meta-atom at (a) toroidal (2850 nm) and (b) magnetic (2150 nm) dipoles resonances.

### 3. Characteristic current-voltage profile

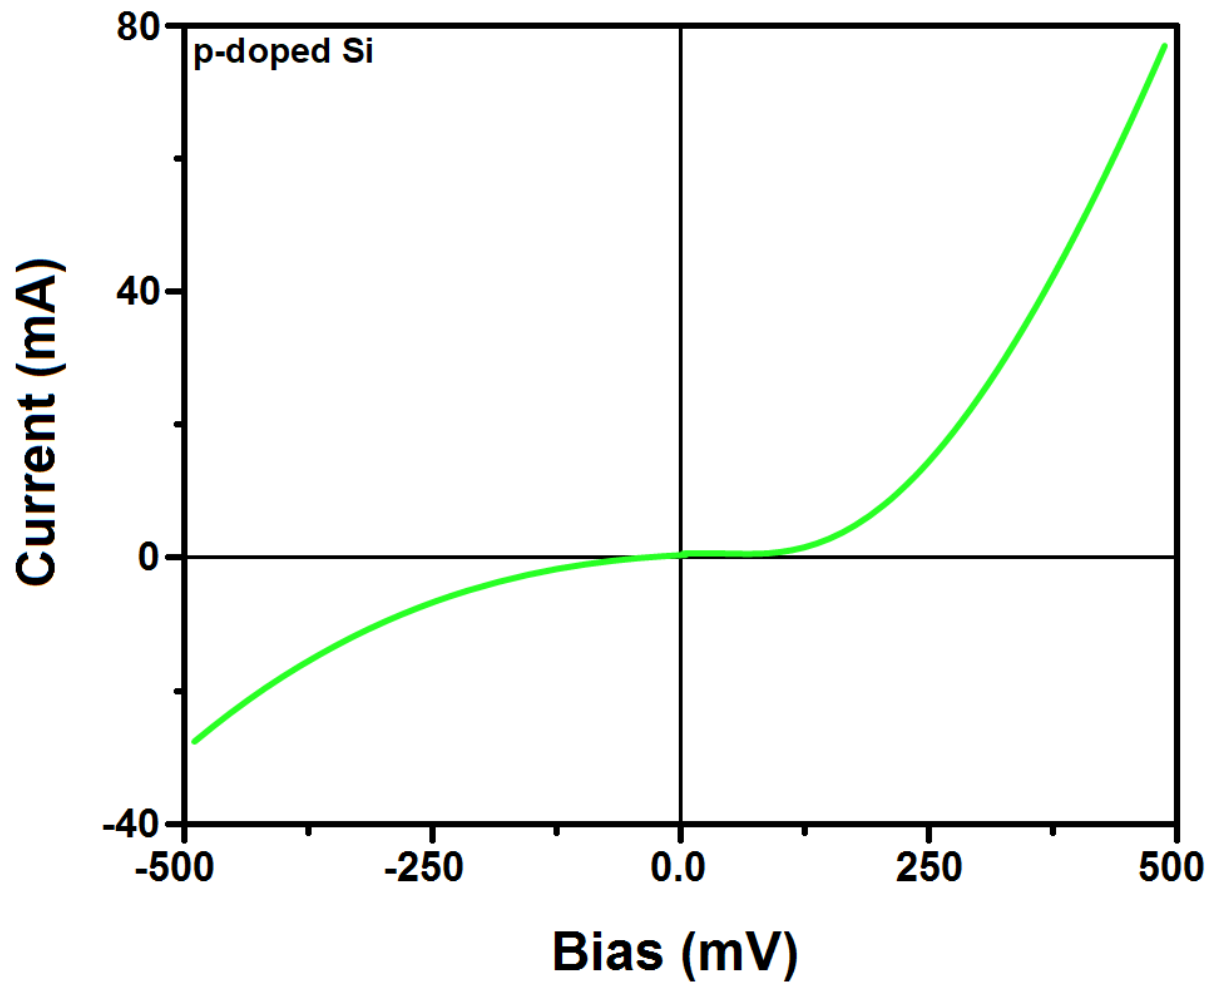

**Figure S3.** Characteristic current-voltage curve for the p-type Si-mediated plasmonic photodetector device at the toroidal dipole wavelength.

#### 4. Dark-current

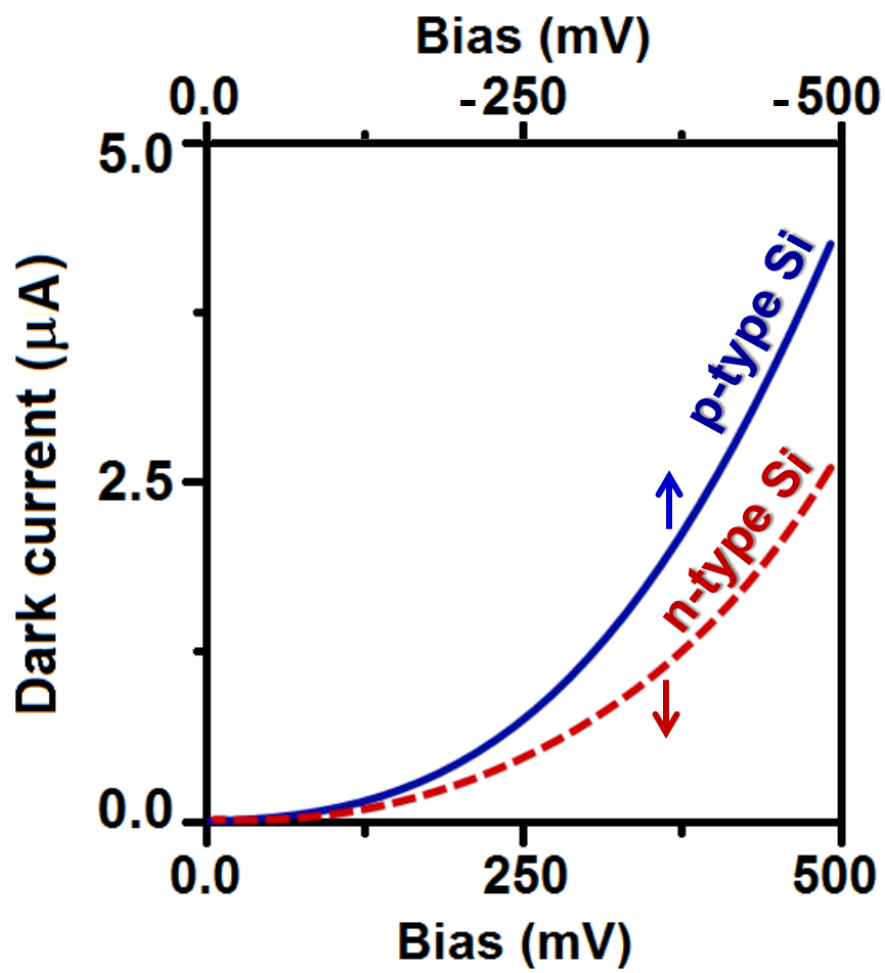

**Figure S4.** *I-V* curves of the toroidal plasmonic photodetector in dark for both n- and p-type Si substrates.

## 5. Operation speed

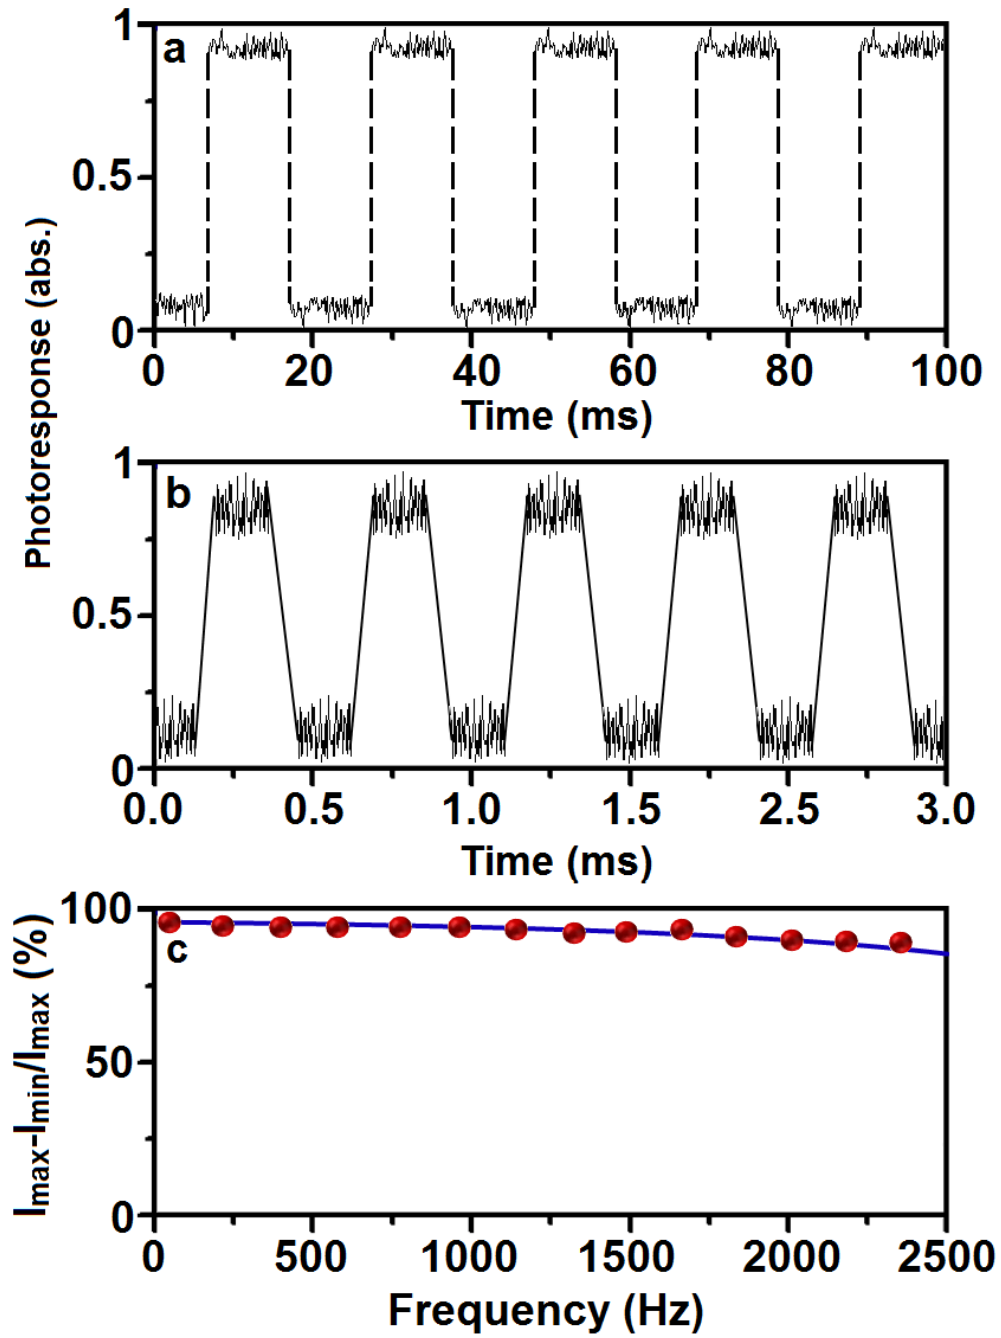

**Figure S5.** Normalized photoresponse of the toroidal plasmonic photodetector to the incident infrared beam at a frequency of a) 100 Hz, and b) 2000 Hz. c) The relative balance as a function of switching frequency of the optical chopper.
